# Supplementary material for: Syntheses and characterization of highly mesoporous crystalline TiO2 macrocellular foams
Source: Royal Society of Chemistry journal article supplement (doi:10.1039/b504336k), 2005-01-01
Supplement: b504336k.pdf [file b504336k.pdf]

*Supporting information*

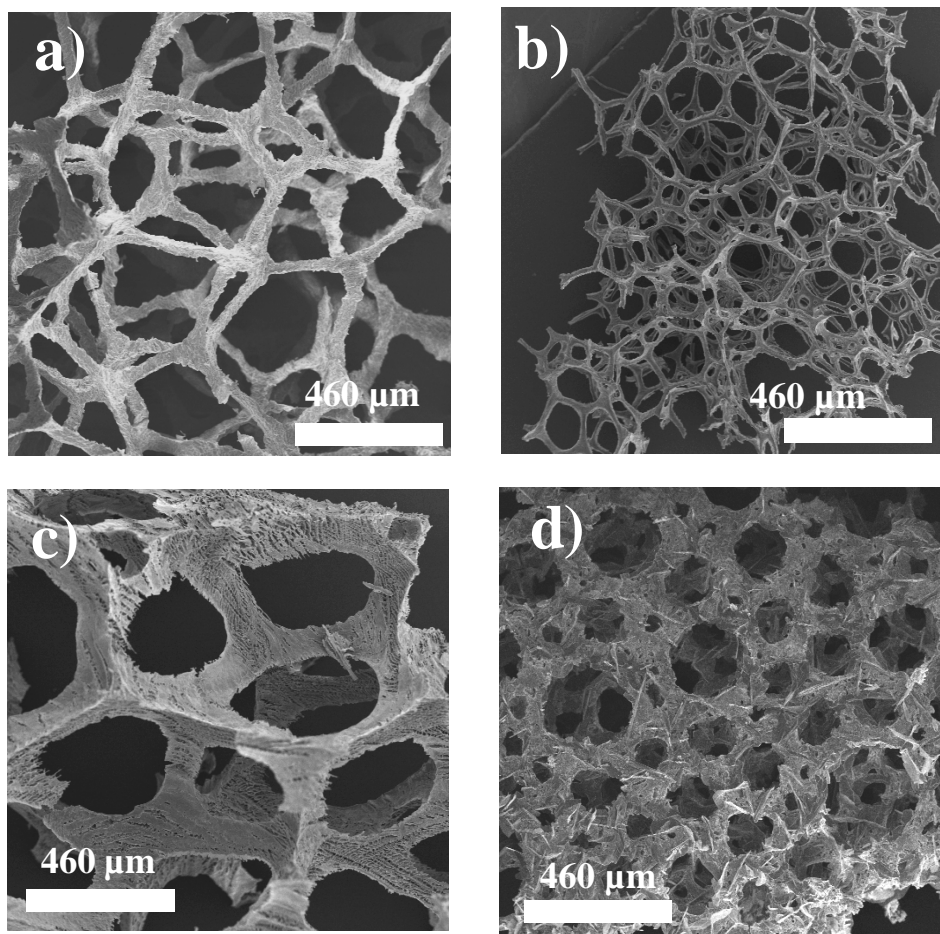

**Figure 1.** SEM visualization of  $\text{TiO}_2$  macroporosity showing the effect of thermal treatment : (a) and (c) sample were obtained without thermal treatment by the Latex/TTAB- $\text{TiO}_2$  patterning strategy for respectively  $Q = 0 \text{ g.s}^{-1}$  and  $Q = 0.192 \text{ g.s}^{-1}$  ; (b) and (d) correspond respectively to the sample (a) and (c) thermally treated at  $450^\circ\text{C}$ .

## *Supporting information*

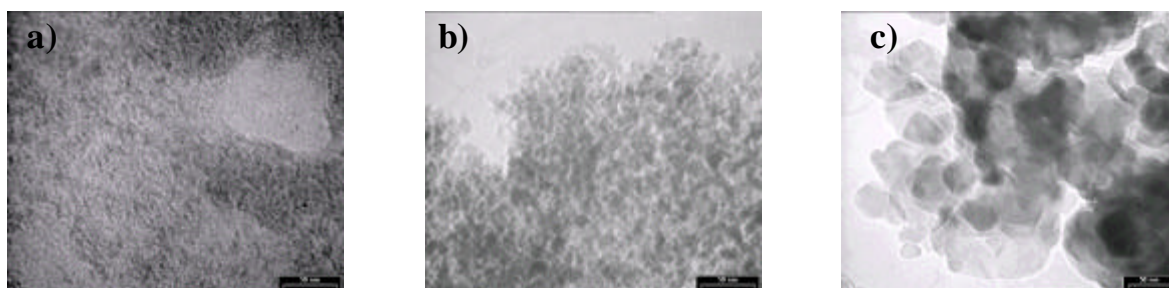

**Figure 2.** TEM visualisation showing the influence of thermal treatment on P123/TTAB-TiO<sub>2</sub> mesostructure : (a) sample was obtained without thermal treatment, (b) sample was thermally treated at 350°C, (c) sample was thermally treated at 450°C.
